# Supplementary material for: Incident Angle Dependence of the Waveform of the Polarization-Sensitive Photoresponse in CuSe/Se Thin Film
Source: MDPI journal article supplement (doi:10.3390/app12146869), 2022-07-07
Supplement: s1 [file s1]

Archive with 1 entries (1 files):
- applsci-1745358-supplementary.pdf
