# Supplementary material for: Incident Angle Dependence of the Waveform of the Polarization-Sensitive Photoresponse in CuSe/Se Thin Film
Source: MDPI journal article supplement (doi:10.3390/app12146869), 2022-07-07
Supplement: s1 [file s1 › applsci-1745358-supplementary.pdf]

## SUPPORTING INFORMATION

### Incident Angle Dependence of the Waveform of the Polarization-Sensitive Photoresponse in CuSe/Se Thin Film

*Fateev A.E., Mogileva T.N., Kogai V.Ya., Mikheev K.G., Mikheev G.M.\**

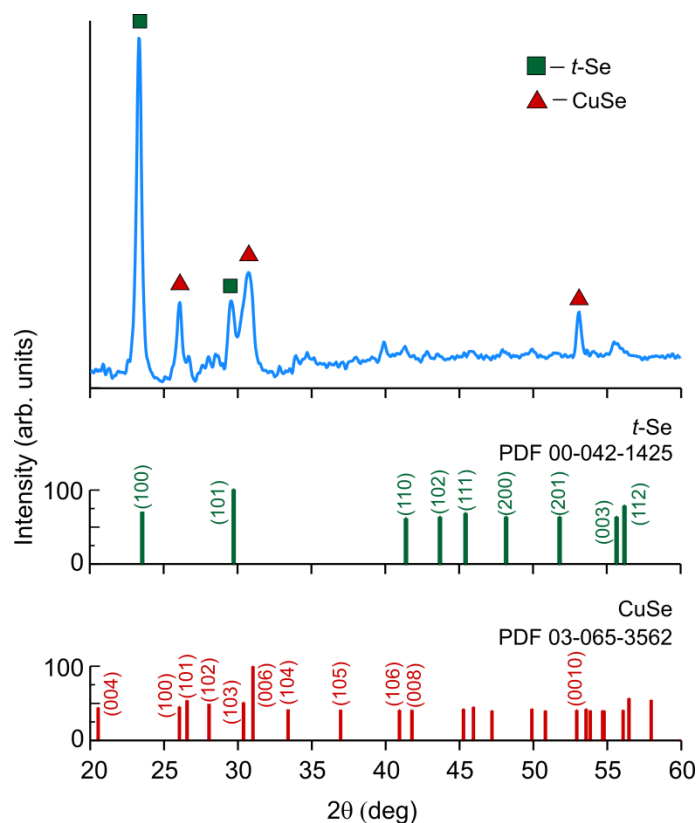

**Figure S1.** X-ray diffractogram of the CuSe/t-Se nanocomposite film and diffraction patterns of CuSe (PDF 00-034-0171) and t-Se (PDF 00-042-1425) powders. A copper-based X-ray tube generating radiation at a wavelength of 0.1541 nm was used.

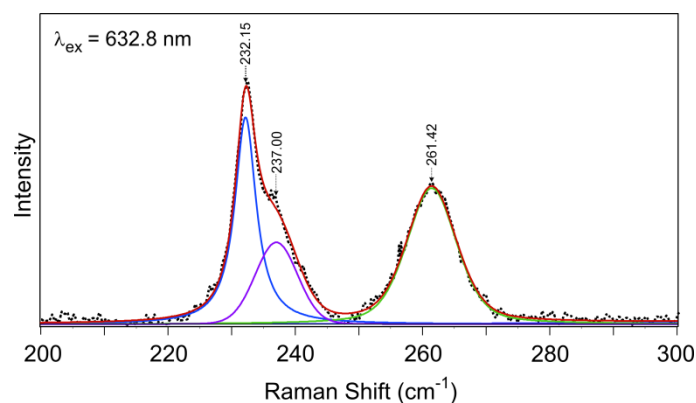

**Figure S2.** Raman spectrum of the CuSe/*t*-Se nanocomposite film (black line). The red line represents the fitting of the combined Gaussian profiles at (blue line) 232 and (purple line) 237  $\text{cm}^{-1}$  corresponding to the *t*-Se and (green line) 262  $\text{cm}^{-1}$  to the CuSe nanocrystallites Raman resonances. A He-Ne laser radiation at a wavelength of 632.8 nm as excitation pumping was used.

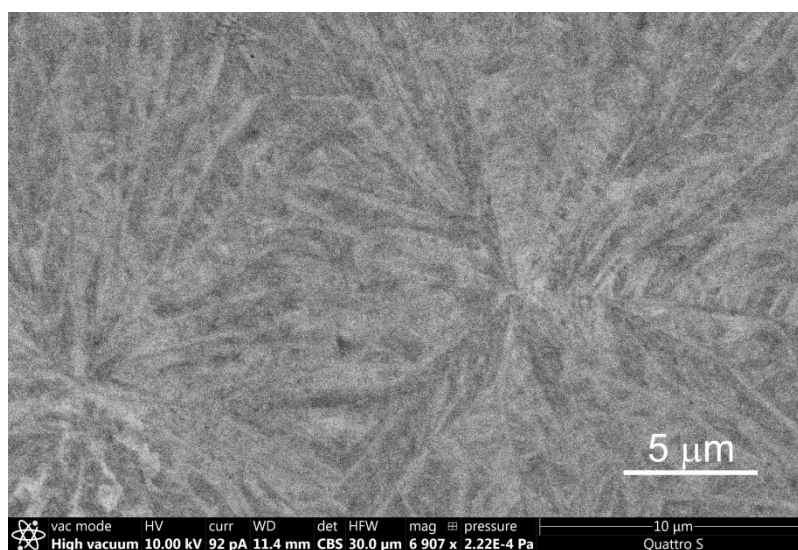

**Figure S3.** Scanning electron microscope image of the CuSe/*t*-Se semitransparent thin film surface.

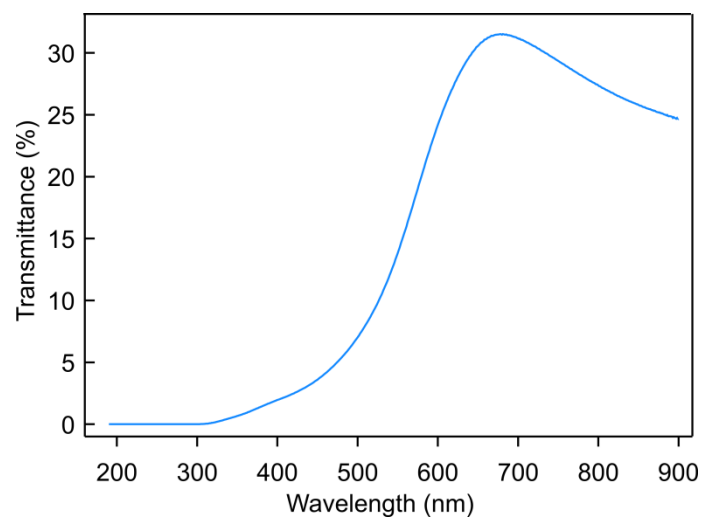

**Figure S4.** The optical transmittance spectrum of the CuSe/*t*-Se nanocomposite.
